# Supplementary material
Source: PubMed Central journal article supplement (PMC5936814)
Supplement: supp_RA117.000347_133008_2_supp_80715_p4j6fl.pdf [file supp_RA117.000347_133008_2_supp_80715_p4j6fl.pdf]

**Supporting information**

**High-fidelity correction of hereditary tyrosinemia in rats through Cas9-nickase-mediated genome editing**

Yanjiao Shao<sup>1,†</sup>, Liren Wang<sup>1,†</sup>, Nana Guo<sup>1</sup>, Shengfei Wang<sup>1</sup>, Lei Yang<sup>1</sup>, Yajing Li<sup>1</sup>, Mingsong Wang<sup>1</sup>, Shuming Yin<sup>1</sup>, Honghui Han<sup>2</sup>, Li Zeng<sup>1,2</sup>, Ludi Zhang<sup>3</sup>, Lijian Hui<sup>3</sup>, Qiurong Ding<sup>4</sup>, Jiqin Zhang<sup>1</sup>, Hongquan Geng<sup>5</sup>, Mingyao Liu<sup>1,6,\*</sup> and Dali Li<sup>1,\*</sup>

**Table of Contents**

**Supplementary Figure 1** Indels generated by Cas9 or Cas9n in on-target sites in HEK293T cells

**Supplementary Figure 2** Off-target events of Cas9 or Cas9n in HEK293T cells

**Supplementary Figure 3** Indels generated by AdV-Cas9

**Supplementary Table 1** Summary of animal groups

**Supplementary Table 2** On-target /off-targt sites and primers used in this study

**Supplementary Table 3** Off-target analyses by deep sequencing

**Supplementary Sequence** HDR template sequence

**A** EMX1-sgRNA1+Cas9

| Target                                                                              | PAM |        |      |
|-------------------------------------------------------------------------------------|-----|--------|------|
| GAGTCCGAGCAGAAGAAGAGGG                                                              | GGG |        |      |
| GGCCTGAGTCCGAGCAGAAGAAGAGGGCTCCCATCACATCAACCGGTGG                                   |     | WT     |      |
| GGCCTGAGTCCGAGCAG---AAGAAGGGCTCCCATCACATCAACCGGTGG                                  |     | -3bp   | x 5  |
| GGCCTGAGTCCGAGC-----AGAAGGGCTCCCATCACATCAACCGGTGG                                   |     | -6bp   | x 8  |
| GGCCTGAGTCCGAGCAGAAGA-----GCTCCCATCACATCAACCGGTGG                                   |     | -6bp   | x 2  |
| GGCCTGAGTCCG-----AGAAGGGCTCCCATCACATCAACCGGTGG                                      |     | -9bp   | x 1  |
| GGCCTG-----AG---CAGAAGGGCTCCCATCACATCAACCGGTGG                                      |     | -12bp  | x 1  |
| GGCCTGAG-----AGAAGGGCTCCCATCACATCAACCGGTGG                                          |     | -13bp  | x 1  |
| GGCCT-----GAAGGGCTCCCATCACATCAACCGGTGG                                              |     | -17bp  | x 1  |
| GGCCTGAGTCCGAGCAG---AAGAA-----CGGTGG                                                |     | -22bp  | x 1  |
| -----GAAGGGCTCCCATCACATCAACCGGTGG                                                   |     | -26bp  | x 1  |
| -----TCCATCACATCAACCGGTGG                                                           |     | -100bp | x 1  |
| GGCCTGAGTCCGAGCAGAAGAAAGAAGGGCTCCCATCACATCAACCGGTGG                                 |     | +1bp   | x 20 |
| GGCCTGAGTCCGAGCAGAAGAA <b>TTTACAGTCAAA</b> TTAATTCTTAATTATCTCTCTAACAGCCTTGTATCCATCA |     | +36bp  | x 1  |
| CATCAACCGGTGG                                                                       |     |        |      |

**B** EMX1-sgRNA1+Cas9n

| Target                                                     | PAM |     |  |
|------------------------------------------------------------|-----|-----|--|
| GAGTCCGAGCAGAAGAAGAGGG                                     | GGG |     |  |
| GGCCTGAGTCCGAGCAGAAGAAGAGGGCTCCCATCACATCAACCGGTGG          |     | WT  |  |
| GGCCTGAGTCCGA <b>ACTT</b> AAGAAGAGGGCTCCCATCACATCAACCGGTGG |     | x 1 |  |

**C** VEGFA-sgRNA3+Cas9

| Target                                                                  | PAM |        |      |
|-------------------------------------------------------------------------|-----|--------|------|
| GGGTGAGTGAGTGTGTGCGTGG                                                  | TGG |        |      |
| TGTGTGGGTGAGTGTGTGTGCGTGTGGGGTTGAGGGCGTTGG                              |     | WT     |      |
| TGTGTGGGTGAGTGTGT-----GTGTGGGGTTGAGGGCGTTGG                             |     | -4bp   | x 1  |
| TGTGTGGGTGAGTGTGT-----GTGTGGGGTTGAGGGCGTTGG                             |     | -6bp   | x 6  |
| TGTGTGGGTGAGCGA-----GTGTGGGGTTGAGGGCGTTGG                               |     | -8bp   | x 9  |
| TGTGTGGGTGAGTGTGTG-----TGG                                              |     | -21bp  | x 1  |
| TGTGTGGG-----TGAGGGCGTTGG                                               |     | -24bp  | x 1  |
| TGTGTGGG-----TGAG <b>T</b> GCGTTGG                                      |     | -24bp  | x 1  |
| TGTGTGGGTGAGTGTGTGTG <b>CC</b> TGTGGGGTTGGGGCGTTGG                      |     | +1bp   | x 14 |
| TGTGTGGGTGAGTGTGTGTG <b>CC</b> TGTGGGGTTGAGGGCGTTGG                     |     | +2bp   | x 1  |
| TGTGTGGGTGAGTGTGTGTG <b>CT</b> TGTGTGGGGTTGAGGGCGTTGG                   |     | +2bp   | x 1  |
| TGTGTGGGTGAGTGTGTGTG <b>CCT</b> TGTGTGGGGTTGAGGGCGTTGG                  |     | +3bp   | x 1  |
| TGTGTGGGTGAGTGTGTGTG <b>CGACGCCTACCTGAACGCCG</b> TGTGTGGGGTTGAGGGCGTTGG |     | +18bp  | x 1  |
| TGTGTGGGTGAGTGTGTGTG <b>CGT</b> CAGAGAC-18bp-TCACCGTGTGGGGTTGAGGGCGTTGG |     | +18bp  | x 1  |
| TGTGTGGGTGAGTGTGTGTG <b>CTACGCC</b> -108bp-TCGCCCTGTGTGGGGTTGAGGGCGTTGG |     | +108bp | x 1  |

**Fig. S1. Indels generated by Cas9 or Cas9n in on-target sites in HEK293T cells.** Indels detected in the on-target sites of (a) the EMX1 locus by Cas9, (b) the EMX1 locus by Cas9n, (c) the VEGFA locus by Cas9. The occurrence frequencies of each on-target indel clone are listed at the right.

**A EMX1-OT+Cas9**

| Target                                                 | PAM |          |
|--------------------------------------------------------|-----|----------|
| GAGTTAGAGCAGAAGAAGGCC                                  |     |          |
| AGACAGATTGTCAGAGTTAGAGCAGAAGAAGGCCATGGAGTAAAGGC        |     | WT       |
| AGACAGATTGTCAGAGTTAGAGCAGAAGAAGCTAGAAAGGCATGGAGTAAAGGC |     | +4bp x 1 |

**B VEGFA-OT-3-1+Cas9**

| Target                                                   | PAM |           |
|----------------------------------------------------------|-----|-----------|
| ACTGAGTGAGTGTGTGTGGGG                                    |     |           |
| CGAGTGAGTGAGTGAGTGAGTGTGTGTGTGGGGGGGACTCGGCTT            |     | WT        |
| CGAGTGAGTGAGTGAGTGAGTGTG--TGTGGGGGGGACTCGGCTT            |     | -2bp x 1  |
| CGAGTGAGTGAGTGAGTGA--GTGTGTGTGGGGGGGACTCGGCTT            |     | -2bp x 1  |
| CGAGTGAGTGAGTGAGTGAGTG---TGTGGGGGGGACTCGGCTT             |     | -4bp x 1  |
| CGAGTGAGTGAGCGAGTGA-----GTGAGTGGGGGGGACTCGGCTT           |     | -6bp x 2  |
| CGAGTGAGTGAGTGAGTGA-----GTGGGGGGGACTCGGCTT               |     | -8bp x 1  |
| CGAGTGAGTGAGTGAGTGAGTGTGTGTGTGGGGGGGACTCGGCTT            |     | +1bp x 26 |
| CGAGTGAGTGAGTGAGTGAGTGTGTGTGGGGGGGACTCGGCTT              |     | +1bp x 4  |
| CGAGTGAGTGAGTGGTGTGTGTGTGTGGGGGGGACTCGGCTT               |     | +1bp x 1  |
| CGAGTGAGTGAGTGAGTGAGTGTGTGTGGCC-41bp-TACTGTGGGGGGGACTCGG |     | +41bp x 1 |
| CGAGTGAGTGAGTGAGTGAGTGTGTGTTCAC-57bp-CCTGTGGGGGGGACTCGG  |     | +57bp x 1 |

**VEGFA-OT-3-2+Cas9**

| Target                                                  | PAM |           |
|---------------------------------------------------------|-----|-----------|
| TGTGGGTGAGTGTGTGCGTGAGG                                 |     |           |
| TTTTATGTGTGGGTGAGTGTGTGCGTGAGGACATTTAAGATC              |     | WT        |
| TTTTATGTGTGGGTGAGTGTGTGCCGTGAGGACATTTAAGATC             |     | +1bp x 4  |
| TTTTATGTGTGGGTGAGTGTGTGACGTGAGGACATTTAAGATC             |     | +2bp x 1  |
| TTTTATGTGTGGGTGAGTGTGTGCTAGC-41bp-TCCGTGAGGACATTTAAGATC |     | +41bp x 1 |

**VEGFA-OT-3-3+Cas9**

| Target                                               | PAM |           |
|------------------------------------------------------|-----|-----------|
| GGTGAGTGAGTGCGTGCGGGTGG                              |     |           |
| GGGAGTGGGTGAGTGAGTGAGTGCGTGCGGGTGGCGATGCAAG          |     | WT        |
| GGGAGTGGGTGAGTGAGTGCCGTGCGGGTGGCGATGCAAG             |     | +1bp x 2  |
| GGGAGTGGGTGAGTGAGTGCGGC-42bp-GGCGGTGCGGGTGGCGATGCAAG |     | +42bp x 1 |

**C VEGFA-OT-3-1+Cas9n**

| Target                                        | PAM |          |
|-----------------------------------------------|-----|----------|
| AGTGAGTGAGTGTGTGTGGGG                         |     |          |
| CGAGTGAGTGAGTGAGTGAGTGTGTGTGTGGGGGGGACTCGGCTT |     | WT       |
| CGAGTGAGTGAGTGAGTGA--GTGTGTGTGGGGGGGACTCGGCTT |     | -2bp x 2 |
| CGAGTGAGTAAGTGAGTGA--GTGTGTGTGGGGGGGACTCGGCTT |     | -2bp x 1 |
| C----GAGTGAGTGAGTGAGTGTGTGTGTGGGGGGGACTCGGCTT |     | -4bp x 1 |
| CGAGTGAGTGAGTGAGTG-G---GTGTGTGGGGGGGACTCGGCTT |     | -4bp x 1 |

**Fig. S2. Off-target events of Cas9 or Cas9n in HEK293T cells.** Indels detected in off-target sites of (a) the EMX1 locus by Cas9, (b) the VEGFA locus by Cas9 and (c) the VEGFA locus by Cas9n. The occurrence frequencies of each off-target indel are listed on the right. Base substitutions and insertions are labeled in red and green respectively. The occurrence frequencies of each off-target indel are listed on the right.

**Fah locus +AdV-Cas9+AdV-HDR**

```

TGTCACTCTTCTCCTAGCCAAAGCCACGGATTGGTGTGACCAGATCTTGGACCTGAGTGTCAATTAACAC FahΔ10/Δ10
TGTCACTCTTCTCCTAGCCAAAGCCACGGATTGGAGTGACCAGATCTTGGACCTGAGTGTCAATTAACAC +1bp
TGTCACTCTTCTCCTAGCCAAAGCCACGGATTGGTGTGACCAGA--TTGGACCTGAGTGTCAATTAACAC -2bp
TGTCACTCTTCTCCTAGCCAAAGCCACGGATTGGTGT-----GACCAAGAGTGTCAATTAACAC -12bp
TGTCACTCTTCTCCTAGCCAAAGCCACGGATTGG-----TGGACCTGAGTGTCAATTAACAC -13bp
TGTCACTCTTCTCCTAGCCAAAGCCACGGATTGGT-----CCTGAGTGTCAATTAACAC -16bp
TGTCACTCTTCTCCTAGCCAAAG-----CCTGAGTGTCAATTAACAC -28bp
TGTCACTCTTCTCCTAGCCAAAG-----C-----CAC -43bp
TGTCAC-----TGGACCTGAGTGTCAATTAACAC -41bp
TGTC-----AGTGTCAATTAACAC -50bp
TGTCACTCTTCTCCTAGCCAAAGCCACGGAAAGCTGA. (total 36bp) .ATTGGTGTGTCAATTAACAC +36bp

```

**Fig. S3. Indels generated by AdV-Cas9.** Sanger sequencing of 98 clones of the amplicons from the Adv-Cas9 treated rat revealed indels caused by Cas9-induced NHEJ. Indel sizes are listed on the right. The target sequence is indicated by the purple characters and the PAM sequence is in blue.

**Table S1** Summary of animal groups

| <b>Injected adenovirus<sup>+</sup></b> | <b>NTBC withdrawal</b> | <b>Surviving<sup>§</sup>/total animals</b> |
|----------------------------------------|------------------------|--------------------------------------------|
| Cas9 + HDR template                    | Yes                    | 3/4                                        |
| Cas9n + HDR template                   | Yes                    | 3/4                                        |
| HDR template                           | Yes                    | 0/4                                        |
| PBS                                    | Yes                    | 0/4                                        |

<sup>+</sup> Animals received total  $2 \times 10^{10}$  virus in 800  $\mu$ L PBS, including  $1 \times 10^{10}$  Cas9 (WT & nickase) and  $1 \times 10^{10}$  HDR template.

<sup>§</sup> NTBC free survival for at least 3 months.

**Table S2 On-target /off-target sites and primers used in this study.**

| <b>On-target and Off-target sites</b> |                               |                |                                |
|---------------------------------------|-------------------------------|----------------|--------------------------------|
| Target ID                             | Target sequence (5'-3')+pam   | Target ID      | Target sequence (5'-3')+pam    |
| Fah <sup>+/+</sup> on-target          | CCACGGATTGGTGTGGCCATCGG       | Fah off 2      | GGACTGGGGTAACCAGATCTTAG        |
| Fah <sup>Δ10/Δ10</sup> on-target      | GGATTGGTGTGACCAGATCTGG        | Fah off 3      | GGATGGGAGTGACCAGCTCTCAG        |
| EMX1 on-target                        | GAGTCCGAGCAGAAGAAGAAGGG       | Fah off 4      | TCACTGGTTTGACCAGATCTGGG        |
| EMX1 OTS                              | GAGTTAGAGCAGAAGAAGAAAGG       | Fah off 5      | GTA CTGGCATGACCAGATCTGGG       |
| VEGFA on-target                       | GGT GAGT GAGT GTGTGCGTGTGG    | Fah off 6      | GGAATTGTGTGACCAGATCAGGG        |
| VEGFA OTS-3-1                         | AGT GAGT GAGT GTGTGTGTGGGG    | Fah off 7      | GTCTGGTGTACCAGATCTGAG          |
| VEGFA OTS-3-2                         | TGTGGGTGAGTGTGTGCGTGAGG       | Fah off 8      | TCAATGGTGTGGCCAGATCTCAG        |
| VEGFA OTS-3-3                         | GGT GAGT GAGT GCGT GCGGGTGG   | Fah off 9      | GCCTCGGTGTGGCCAGATCTTGG        |
| Fah off 1                             | GCAATGGTGGGACCAGATCTGGG       | Fah off 10     | GCCTGGGTGTGCCAGATCTGAG         |
| <b>Primers for PCR amplification</b>  |                               |                |                                |
| Primer ID                             | Primer sequence               | Primer ID      | primer sequence                |
| Fah PCR-F                             | CTGCTGCATTTAAGCTACCAC         | Fah PCR-R      | CATAGAAGCCAGGATGAGTGT          |
| EMX1-F                                | CTCTTCCTGCCCTGCCATCC          | EMX1-R         | CCAGCCCATTGCTTGTCCCT           |
| EMX1 OT-F                             | ATACAATGGGAAGGACAGC           | EMX1 OT-R      | TGTGGAGGCAATAAAGTGA            |
| VEGFA 3-F                             | CAGATGGCACATTGTCAGAGGG        | VEGFA 3-R      | GAGGGAGCAGGAAAGTGAGGTTA        |
| VEGFA OT-3-1-F                        | GTCGCCTGGATGCGGTTTC           | VEGFA OT-3-1-R | CGTTATCGCTCATTTCCCTACGG        |
| VEGFA OT-3-2-F                        | TGTATCCCTGGATTTTCGTAT         | VEGFA OT-3-2-R | ATCTAATGTATGGCATGGTG           |
| VEGFA OT-3-3-F                        | CTGCATTTCTTTGGCGTCTC          | VEGFA OT-3-3-R | AGCACAGCCCTTACTCCTCC           |
| rFah-OT1-F                            | ATTCAGAGTAGCATTCCCCACAGCAGC   | rFah-OT1-R     | TCTCGAGAGGGGAGTTTCAGGGACCAC    |
| rFah-OT2-F                            | TATAGCCTAGAGTTCCTCATTTTGTCC   | rFah-OT2-R     | ATAGAGGCACTGTCTATTTATCCATTCG   |
| rFah-OT3-F                            | CCTATCCTGAAGGAAGATGAGAAATGA   | rFah-OT3-R     | GGCTCTGACTGTTTTCCCTTAGAGTT     |
| rFah-OT4-F                            | AGGCGAAGGGTCATCTCCTGCCTCTGC   | rFah-OT4-R     | TAATCTTAAGTGGGTAAGTCTAAGAATACA |
| rFah-OT5-F                            | CAGGACGTCTGTCATGGGACTCCTCGTC  | rFah-OT5-R     | GTA CTGACTACAGGCAAATCCC GTTC   |
| rFah-OT6-F                            | ATTACTCGAAGAAAGCCAAGAATGACA   | rFah-OT6-R     | TCCGGAGAACCATCGACAGTTGAGGAC    |
| rFah-OT7-F                            | CGCTCATTAGCAGGGCTCTGGTCAGGA   | rFah-OT7-R     | GAGATTCCGCCGAGGCTCAGGGAAACA    |
| rFah-OT8-F                            | GAATTCGTTCCCAATGGGATAGTTAAG   | rFah-OT8-R     | CTGAAGCTTTTGCTCACTCAGTTCAC     |
| rFah-OT9-F                            | TAATGCGCAGTTCCTACCCATAAGCCATC | rFah-OT9-R     | CGGCTATGCCAAGACCTTAGACTCCCT    |
| rFah-OT10-F                           | TCCGCGAAAGGAGGTTTGGGTAAGACA   | rFah-OT10-R    | AGCGATAGTTTGAAGCCTACATACGAG    |
| IFN-β1 PCR-F                          | TGCCATTCAAGTGTATGCTCC         | IFN-β1 PCR-R   | CACCCAAGTCAATCTTTCCTCT         |
| IL6 PCR-F                             | GTCTTCTGGAGTTCGGTTTC          | IL6 PCR-R      | GATGGTCTTGGTCCTTAGCC           |
| IL10 PCR-F                            | CAGGACTTTAAGGGTTACTTGG        | IL10 PCR-R     | CATTCTTACCTGCTCCACT            |
| β-actin PCR-F                         | GTACGCCAACACAGTGCTG           | β-actin PCR-R  | CGTCATACTCCTGCTTGCTG           |

**Table S3 Off-target analyses by deep sequencing.** Potential off-target sites predicted and scored by CRISPR Design for the on target sgRNA. Mismatched base pairs are labeled in red.

| ID         | Score | Spacer + PAM              | Coordinate      | Mismatches | Indel Adv-Cas9 | Indel Adv-CAs9n | Indel PBS |
|------------|-------|---------------------------|-----------------|------------|----------------|-----------------|-----------|
| Fah_sgRNA  |       | GGATTGGTGTGACCAGATCTTGG   |                 |            |                |                 |           |
| Fah_off_1  | 2.5   | GCAATGGTGGGACCAGATCTGGG   | chr1:+283240856 | 3          | 0.0039         | 0.0039          | 0.0033    |
| Fah_off_2  | 1.4   | GGACTGGGGTAACCAGATCTTAG   | chr19:-10419394 | 3          | 0.0019         | 0.0018          | 0.0016    |
| Fah_off_3  | 1.1   | GGATGGGAGTGACCAGCTCTCAG   | chr8:-80645234  | 3          | 0.0013         | 0.0015          | 0.0012    |
| Fah_off_4  | 0.9   | TCACTGGTTTGACCAGATCTGGG   | chr2:-137494772 | 4          | 0.001          | 0.001           | 0.0007    |
| Fah_off_5  | 0.8   | GTA CTGGCATGACCAGATCTGGG  | chr1:-124157008 | 4          | 0.0025         | 0.0022          | 0.0021    |
| Fah_off_6  | 0.8   | GGAATTGTGTGACCAGATCAGGG   | chr4:+228450195 | 3          | 0.001          | 0.0008          | 0.002     |
| Fah_off_7  | 0.8   | GTCC TGGTGTCAACCAGATCTGAG | chr15:-38501543 | 4          | 0.0017         | 0.0015          | 0.0015    |
| Fah_off_8  | 0.7   | TCAATGGTGTGGCCAGATCTCAG   | chr7:+78415288  | 4          | 0.0013         | 0.0013          | 0.0009    |
| Fah_off_9  | 0.7   | GCCTCGGTGTGGCCAGATCTTGG   | chr16:+7326951  | 4          | 0.0014         | 0.0014          | 0.0011    |
| Fah_off_10 | 0.7   | GCCTGGGTGTGCCAGATCTGAG    | chr18:-30124498 | 4          | 0.002          | 0.0013          | 0.0015    |

**Supplemental sequence** HDR template sequence ( 5'-3' )

ACACTATTATGCCACTATTACAGCATTGTGGAGATCTTGCTATCCCAGTGATTGTTGGGATACAT  
AGGCATTAGAGCTGGGTAAGGCTACTCATAGCTCTCCTCGCTTGGCAACTTATAAAGCACTAA  
AATGACTTAATACAATTGGGAGGCCCTTGTTACACATGACTAGGCAGGTAATGCCTGTGATCA  
GGTAACAGATGACTTAGTGAGAGGTTCTTCTTGCCCTCAGCAAGGCATAGGATGATTGCCTC  
TGAGTCTTTCCTGAACACCACCTGAGTGGACCCCCCAACTTAAGTAAATTCAGCTTGCTGATC  
TTTGTGGCTGAATGAAGGCCCAGGGAATTACAGAGCTGAGAACACACAGGTTCTCCAGGGAA  
GCTTCTAAGGTTTATGTGGCCTTAGTCTACCCCTAATCCCTGGGGGCTTCCAGGCAGCTACTTC  
TCTTAGCCCCTGAAAGGAGCACTGGAGACAGACACAGCCAAGGATTCTACATCTCACCTCT  
CCTGGATCTCCTAGAATATGGCAGAACTGCTGCTTCAGGTGCCAAGGAAGCCTAGCTTAGGAC  
AGAGTTCAGGAGGTGAAATCTTCCAACATGCTCAGTGCTGTGAGGTCAGAGACCAGCCTTG  
ACAAGATATTGGGCCTCTGTGTTCAATTTGAATCCATGCAGAGCTCTTACAGTGCATAAAAGAA  
ATCCATTCATTTGGTCTGAGCACTGTGCCTTCTGCAGTTCCCTACGGCCTGAGCTCTGCTGCAT  
TTAAGCTACCACAGAGCTGATACTCCAAGTTACTACATGTGTAACACTCACTGCTCTGCTTCAT  
AAGAGAATGGCCCTGAGCAAAGCCCTGGGCCGAGCATGAAAAGAGGTTTCGGGTTCTTGGA  
AGGTGATGAGCAACTCATAACTAGAGATCATGGCTCTGCTTTCTTTCTTGTCCCTGGATCCCCTC  
TCAATGGAATCCATGAGTCCCTAAGTAACTGTGCTGTGACTGTCAGAACTGACTGTCACTCTT  
CTCCTAGCCAAAGCCAAGGATCGGAGTCACGTGGACCTGAGTGTCAATAAACACCTCTTTACC  
GGACCTGTCTCTCCAAACATCAGCATGTCTTCGATGAG GTAGGACATTGTGTCATGGACTGT  
CTCTGTCTCACCACCTACTACAAATGACATAGCATCTTCATAGTCACCAGTTATTCCCGGATGA  
GGAGGAGCTGTTCTGAGACACACAGGTGGCATGAGGTAGCCTCGACACCTTAGGGCAGCTTC  
TCAATAGAATGTGAGCTCCTGAGTCCAGTGGATCTCTCCAAGTTGCCTATGAGGTGAGACTGT  
TGTGTTAGCCTGGTTCCTTTATATAACAAGGATGTTTCATGCTTTGGTCTTTGGAGGCTCAGGAAA  
ACCTTGAGAAAAGGAGCCATGAGCCTTGCAGTCTAGATTTTAGGGTAAAGCTTGAGACACTC  
ATCCTGGCTTCTATGTTTCATGAATGATGACTGCCAGTACTTCAAGGGTACAGTCCTGGGGCAT  
CCAACCTTGCTTGTGTGTCTGTGTAGGATGCCTACCCTGTCATCCAGGTATGCAGTTGTGCCTG  
GGGCAGCCAGCTTGTCTACCTCGTCTGTGTGGGATGGATGTAACCTTC
